# Supplementary material
Source: MDPI journal article supplement (https://www.mdpi.com/1999-4907/11/12/1265)
Supplement: s1 [file s1]

# Supplementary Materials

*Table S1. List of activities included in the FRELs submitted by the countries to the UNFCCC, as of September 2020, and contribution (%) of degradation to gross forest emissions in countries that include degradation reference levels.*

| Country                          | Deforestation | Degradation (by canopy cover change) | Degradation (by specific drivers) | Enhancements (A/R*) | Enhancements (forest remaining forests) | Sustainable Forest Management | Contribution (%) of degradation to gross emissions |
|----------------------------------|---------------|--------------------------------------|-----------------------------------|---------------------|-----------------------------------------|-------------------------------|----------------------------------------------------|
| Argentina                        | x             |                                      |                                   |                     |                                         |                               |                                                    |
| Bangladesh                       | x             | x                                    |                                   | x                   | x                                       |                               | 10.0%                                              |
| Belize                           | x             | x                                    |                                   | x                   |                                         |                               |                                                    |
| Bhutan                           | x             |                                      |                                   | x                   |                                         | x                             |                                                    |
| Brazil                           | x             |                                      |                                   |                     |                                         |                               |                                                    |
| Burkina Faso                     | x             | x                                    |                                   | x                   | x                                       |                               | 19.5%                                              |
| Cambodia                         | x             |                                      |                                   | x                   |                                         |                               |                                                    |
| Chile                            | x             |                                      | x                                 | x                   | x                                       |                               | 73.0%                                              |
| Colombia                         | x             |                                      |                                   |                     |                                         |                               |                                                    |
| Congo                            | x             |                                      | x                                 |                     |                                         |                               | 44.0%                                              |
| Costa Rica                       | x             |                                      |                                   | x                   |                                         |                               |                                                    |
| Côte d'Ivoire                    | x             |                                      |                                   | x                   |                                         |                               |                                                    |
| Democratic Republic of the Congo | x             |                                      |                                   |                     |                                         |                               |                                                    |
| Dominican Republic               | x             | x                                    |                                   | x                   | x                                       |                               | 5.9%                                               |
| Ecuador                          | x             |                                      |                                   |                     |                                         |                               |                                                    |
| Equatorial Guinea                | x             |                                      | x                                 |                     |                                         |                               | 60.5%                                              |
| Ethiopia                         | x             |                                      |                                   | x                   |                                         |                               |                                                    |
| Ghana                            | x             |                                      | x                                 | x                   |                                         |                               | 34.0%                                              |
| Guinea-Bissau                    | x             |                                      |                                   |                     |                                         |                               |                                                    |

|                                        |   |   |   |   |   |       |
|----------------------------------------|---|---|---|---|---|-------|
| Guyana                                 | x |   | x |   |   | 28.0% |
| Honduras                               | x | x |   | x |   | 32.0% |
| India                                  |   |   |   |   | x |       |
| Indonesia                              | x | x |   |   |   |       |
| Kenya                                  | x | x |   | x | x | 17.6% |
| Lao People's<br>Democratic<br>Republic | x | x |   | x | x | 66.0% |
| Liberia                                | x | x |   |   |   | 61.4% |
| Madagascar                             | x |   |   |   |   |       |
| Malawi                                 | x |   | x | x |   | 70.7% |
| Malaysia                               | x |   |   |   | x |       |
| Mexico                                 | x | x |   |   |   | 9.3%  |
| Mongolia                               | x |   | x | x | x | 63.5% |
| Mozambique                             | x |   |   |   |   |       |
| Myanmar                                | x |   |   | x |   |       |
| Nepal                                  | x |   | x | x |   | 30.5% |
| Nicaragua                              | x | x |   | x |   | 13.9% |
| Nigeria                                | x |   |   |   |   |       |
| Pakistan                               | x |   |   |   |   |       |
| Panama                                 | x |   | x | x |   |       |
| Papua New<br>Guinea                    | x |   | x |   |   | 86.4% |
| Paraguay                               | x |   |   |   |   |       |
| Peru                                   | x |   |   |   |   |       |
| Solomon<br>Island                      | x |   | x | x |   | 94.9% |
| Sri Lanka                              | x |   |   | x |   |       |
| Sudan                                  | x |   |   | x |   |       |
| Suriname                               | x |   | x |   |   | 24.0% |
| Togo                                   | x |   |   | x |   |       |
| Uganda                                 | x |   |   |   |   |       |

|                             |   |   |  |   |  |   |
|-----------------------------|---|---|--|---|--|---|
| United Republic of Tanzania | x |   |  |   |  |   |
| Viet Nam                    | x | x |  | x |  | x |
| Zambia                      | x |   |  |   |  |   |

\*A/R, Afforestation/Reforestation.

Table S2. Uncertainty, carbon pools, and gases included in the FRELs submitted by countries to the UNFCCC, as of September 2020.

| Country                          | Reported FREL uncertainty |         |      |              | Included carbon pools     |                               |                        | Gases included       |                                               |
|----------------------------------|---------------------------|---------|------|--------------|---------------------------|-------------------------------|------------------------|----------------------|-----------------------------------------------|
|                                  | <10%                      | 10%-20% | >20% | Not provided | Living biomass pools only | Living and dead biomass pools | Biomass and soil pools | CO <sub>2</sub> only | CO <sub>2</sub> and non-CO <sub>2</sub> gases |
| Argentina                        |                           | x       |      |              | x                         |                               |                        | x                    |                                               |
| Bangladesh                       |                           |         | x    |              | x                         |                               |                        | x                    |                                               |
| Belize                           |                           |         |      | x            | x                         |                               |                        |                      | x                                             |
| Bhutan                           |                           | x       |      |              |                           |                               | x                      |                      | x                                             |
| Brazil                           |                           |         |      | x            |                           | x                             |                        | x                    |                                               |
| Burkina Faso                     |                           |         |      | x            |                           |                               | x                      | x                    |                                               |
| Cambodia                         |                           |         |      | x            | x                         |                               |                        | x                    |                                               |
| Chile                            |                           |         | x    |              |                           | x                             |                        |                      | x                                             |
| Colombia                         |                           |         | x    |              |                           |                               | x*                     | x                    |                                               |
| Congo                            |                           |         |      | x            |                           | x                             |                        | x                    |                                               |
| Costa Rica                       |                           |         | x    |              |                           | x                             |                        |                      | x                                             |
| Côte d'Ivoire                    |                           |         |      | x            |                           | x                             |                        | x                    |                                               |
| Democratic Republic of the Congo | x                         |         |      |              | x                         |                               |                        | x                    |                                               |
| Dominican Republic               |                           |         | x    |              |                           |                               | x                      | x                    |                                               |
| Ecuador                          |                           |         |      | x            |                           | x                             |                        | x                    |                                               |
| Equatorial Guinea                |                           |         | x    |              |                           | x                             |                        | x                    |                                               |

|                                  |   |     |   |
|----------------------------------|---|-----|---|
| Ethiopia                         | x |     |   |
| Ghana                            | x | x   | x |
| Guinea-Bissau                    | x | x   | x |
| Guyana                           | x | x   | x |
| Honduras                         | x | x   | x |
| India                            | x | x   | x |
| Indonesia                        | x | x** | x |
| Kenya                            | x | x   | x |
| Lao People's Democratic Republic | x | x   | x |
| Liberia                          | x | x   | x |
| Madagascar                       | x | x   | x |
| Malawi                           | x | x   | x |
| Malaysia                         | x | x   | x |
| Mexico                           | x | x   | x |
| Mongolia                         | x | x   | x |
| Mozambique                       | x | x   | x |
| Myanmar                          | x |     | x |
| Nepal                            | x | x   | x |
| Nicaragua                        | x | x   | x |
| Nigeria                          | x | x   | x |
| Pakistan                         | x | x   | x |
| Panama                           | x | x   | x |
| Papua New Guinea                 | x | x   | x |
| Paraguay                         | x | x   | x |
| Peru                             | x | x   | x |
| Solomon Island                   | x | x   | x |
| Sri Lanka                        | x | x   | x |
| Sudan                            | x | x   | x |

|                                   |   |   |   |
|-----------------------------------|---|---|---|
| Suriname                          | x | x | x |
| Togo                              | x | x | x |
| Uganda                            | x | x | x |
| United<br>Republic of<br>Tanzania | x | x | x |
| Viet Nam                          | x | x | x |
| Zambia                            | x | x | x |

\* only living biomass and soil carbon pool; \*\* only aboveground biomass and soil carbon pool.
